# Supplementary material for: Conversion of glucose into 5-hydroxymethylfurfural catalyzed by chromium(iii) Schiff base complexes and acidic ionic liquids immobilized on mesoporous silica
Source: Royal Society of Chemistry journal article supplement (doi:10.1039/c5ra08080k), 2015-01-01
Supplement: c5ra08080k1.pdf [file c5ra08080k1.pdf]

# Conversion of glucose into 5-hydroxymethylfurfural catalyzed by chromium(III) schiff base complexes and acidic ionic liquids immobilized on mesoporous silica

Yanfang Wang, Zhen Gu, Wentao Liu, Yuan yao, Haijun Wang\*, Xiao-Feng Xia, Wei

Li

*<sup>a</sup>School of Chemical and Material Engineering, Jiangnan University, Wuxi 214122, China*

## Supplementary Information

### Ligand Analysis

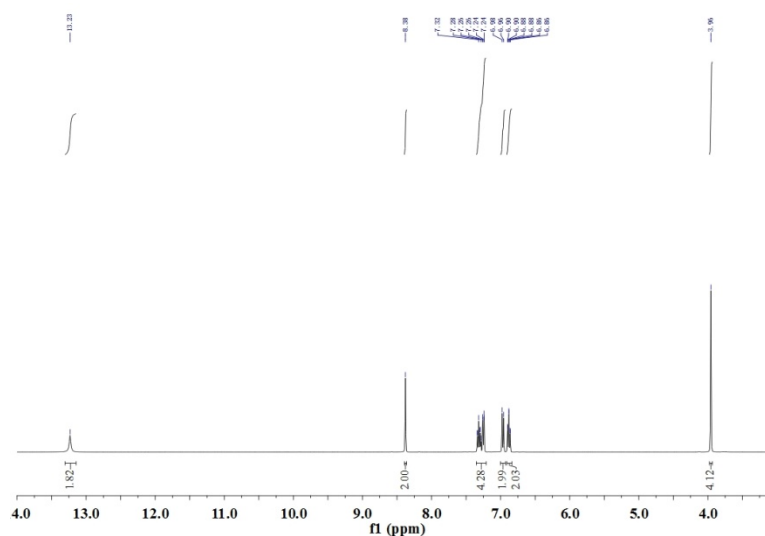

**Figure S1:**  $^1\text{H}$  NMR spectrum of Salen.

$^1\text{H}$  NMR ( $\text{CDCl}_3$ , 400 MHz):  $\delta$  ppm 13.23 (s, 2H), 8.38 (s, 2H), 7.35-7.21 (m, 5H), 6.97 (d, 2H,  $J=8.3$  Hz), 6.88 (td, 2H,  $J=7.6, 0.9$  Hz), 3.96 (s, 4H).

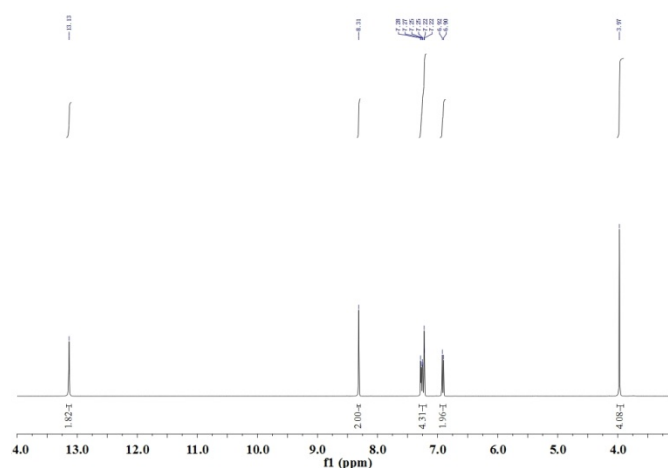

**Figure S2:**  $^1\text{H}$  NMR spectrum of Salen-Cl.

$^1\text{H}$  NMR ( $\text{CDCl}_3$ , 400 MHz):  $\delta$  ppm 13.13 (s, 2H), 8.31 (s, 2H), 7.31-7.19 (m, 5H), 6.91 (d, 2H,  $J=8.7$  Hz), 3.97 (s, 4H).

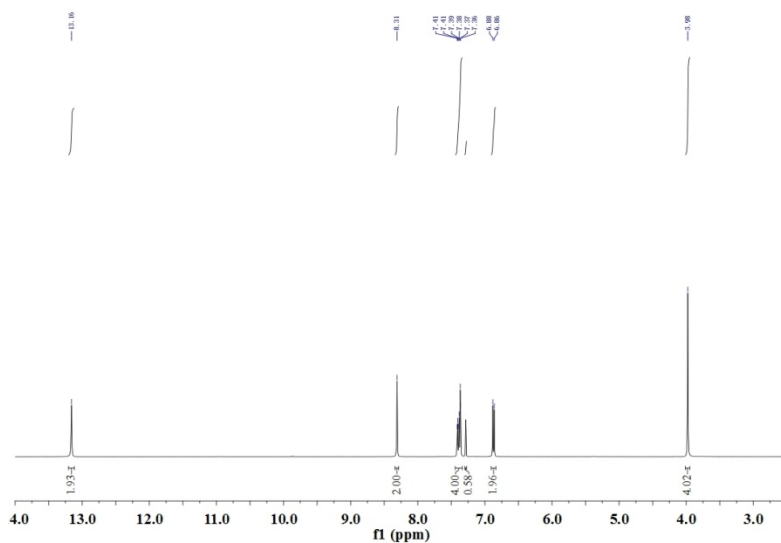

**Figure S3:**  $^1\text{H}$  NMR spectrum of Salen-Br.

$^1\text{H}$  NMR ( $\text{CDCl}_3$ , 400 MHz):  $\delta$  ppm 13.16 (s, 2H), 8.31 (s, 2H), 7.44-7.34 (m, 5H), 6.87 (d, 2H,  $J=8.7$  Hz), 3.98 (s, 4H).

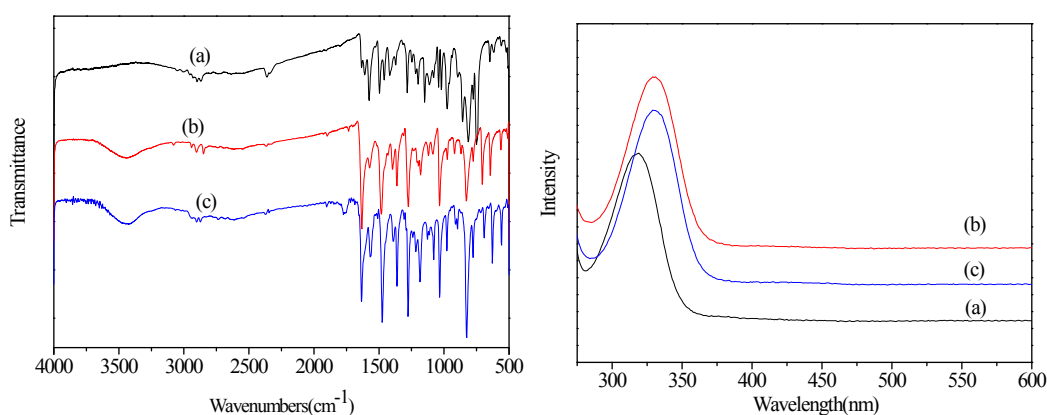

**Figure S4:** FT-IR (KBr disc) and UV-Vis spectrum of Salen(a), Salen-Cl(b), Salen-Br(c).

Salen(a), FT-IR(KBr,  $\text{cm}^{-1}$ ): 1633, 1606, 1575, 1460, 1416, 1282, 1020, 813, 749.

UV-Vis spectrum in  $\text{CH}_2\text{Cl}_2$  ( $\lambda_{\text{max}}$ , nm): 317.

Salen-Cl(b), FT-IR(KBr,  $\text{cm}^{-1}$ ): 3441, 1632, 1482, 1274, 1034, 828, 705, 645. UV-Vis spectrum in  $\text{CH}_2\text{Cl}_2$  ( $\lambda_{\text{max}}$ , nm): 330.

Salen-Br(c), FT-IR(KBr,  $\text{cm}^{-1}$ ): 3438, 1634, 1474, 1276, 1033, 826, 776, 691. UV-Vis spectrum in  $\text{CH}_2\text{Cl}_2$  ( $\lambda_{\text{max}}$ , nm): 332.

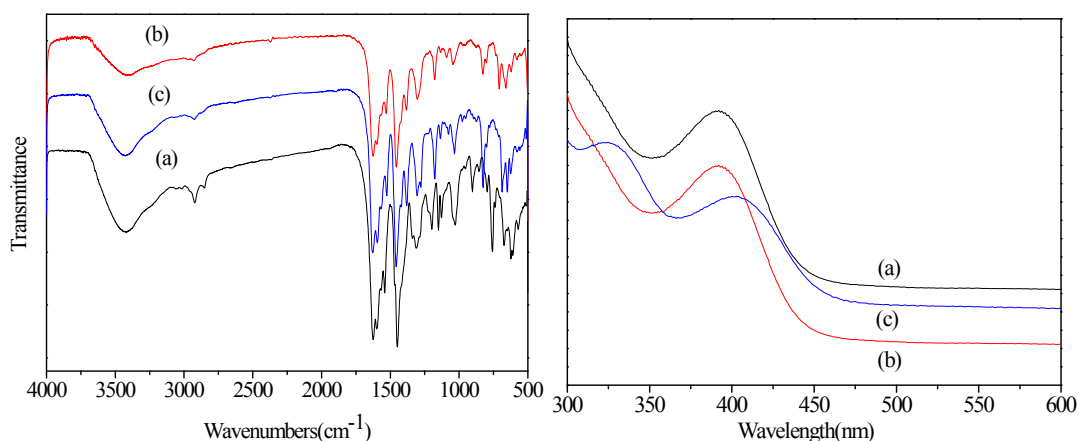

**Figure S4:** FT-IR (KBr disc) and UV-Vis spectrum of Cr-Salen(a), Cr(Salen-Cl)(b), Cr(Salen-Br)(c).

Cr(Salen), FT-IR(KBr,  $\text{cm}^{-1}$ ): 3418, 2921, 1623, 1594, 1449, 1311, 1029, 757, 672, 620, 569. UV-Vis spectrum in  $\text{CH}_2\text{Cl}_2$  ( $\lambda_{\text{max}}$ , nm): 391.

Cr(Salen-Cl), FT-IR(KBr,  $\text{cm}^{-1}$ ): 3402, 2929, 1625, 1602, 1456, 1383, 1304, 1177, 826, 708, 660. UV-Vis spectrum in  $\text{CH}_2\text{Cl}_2$  ( $\lambda_{\text{max}}$ , nm): 401.

Cr(Salen-Br), FT-IR(KBr,  $\text{cm}^{-1}$ ): 3426, 2921, 1628, 1594, 1457, 1380, 1304, 1177, 1033, 825, 687, 649. UV-Vis spectrum in  $\text{CH}_2\text{Cl}_2$  ( $\lambda_{\text{max}}$ , nm): 402.

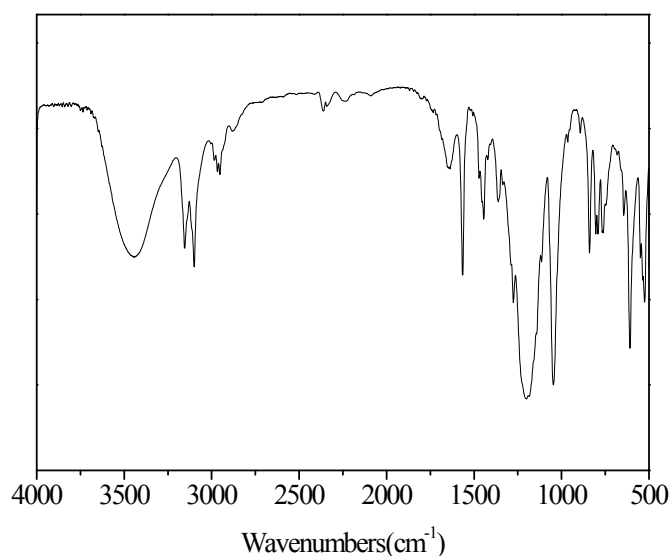

**Figure S5:** FT-IR (KBr disc) spectrum of [CPTES-IM-SO<sub>3</sub>H][HSO<sub>4</sub>]

FT-IR(KBr,  $\text{cm}^{-1}$ ): 3443, 3154, 3100, 2952, 1565, 1444, 1361, 1275, 1184, 1046, 840, 608.

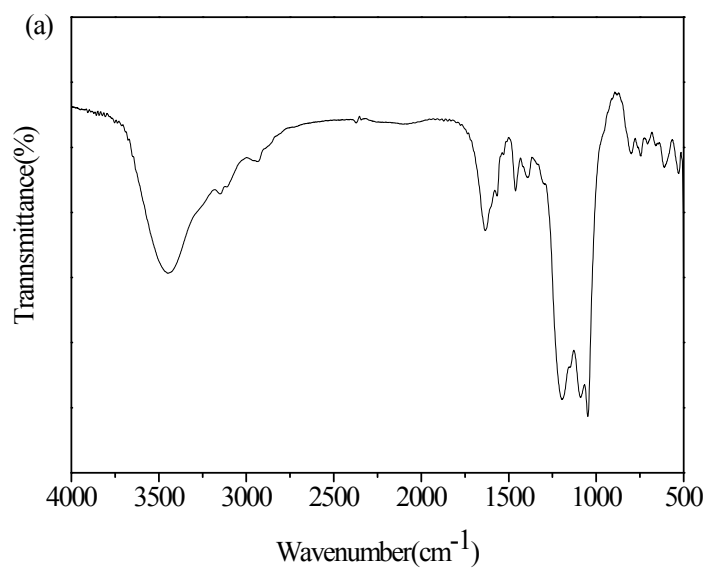

**Figure S6 (a)** FT-IR spectra of Cr(Salen)-IM-Cl-MCM-41

FT-IR(KBr,  $\text{cm}^{-1}$ ): 3441, 3155, 2931, 1625, 1545, 1460, 1388, 1192, 1089, 1048, 803, 740, 601, 524.

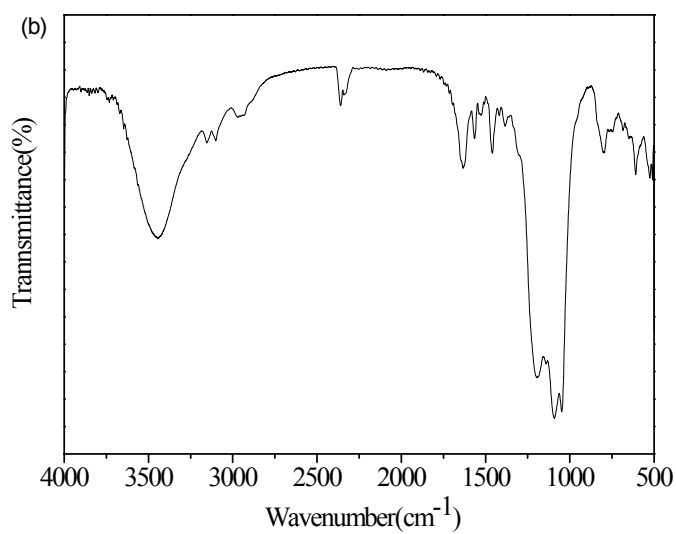

**Figure S6 (b)** FT-IR spectra of Cr(Salen-Cl)-IM- HSO<sub>4</sub>-MCM-41.

FT-IR(KBr,  $\text{cm}^{-1}$ ): 3445, 3159, 3103, 2363, 1626, 1564, 1460, 1190, 1089, 1048, 783, 605, 507.

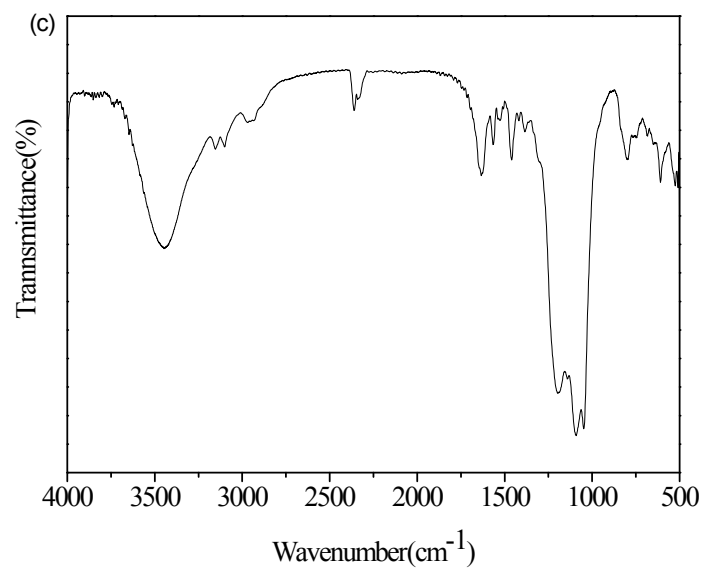

**Figure S6 (c)** FT-IR spectra of Cr(Salen-Cl)-IM- HSO<sub>4</sub>-MCM-41.

FT-IR(KBr, cm<sup>-1</sup>): 3441, 3160, 3105, 2361, 1627, 1565, 1459, 1191, 1091, 1048, 785, 607, 509.

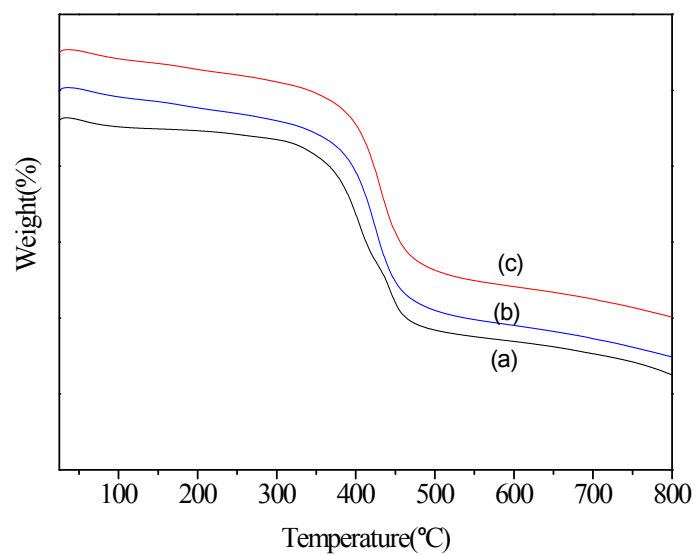

**Figure S7** TG analysis for the Cr(Salen)-IM-Cl-MCM-41(a), Cr(Salen-Cl)-IM-HSO<sub>4</sub>-MCM-41 (b), and Cr(Salen-Br)-IM-HSO<sub>4</sub>-MCM-41(c).

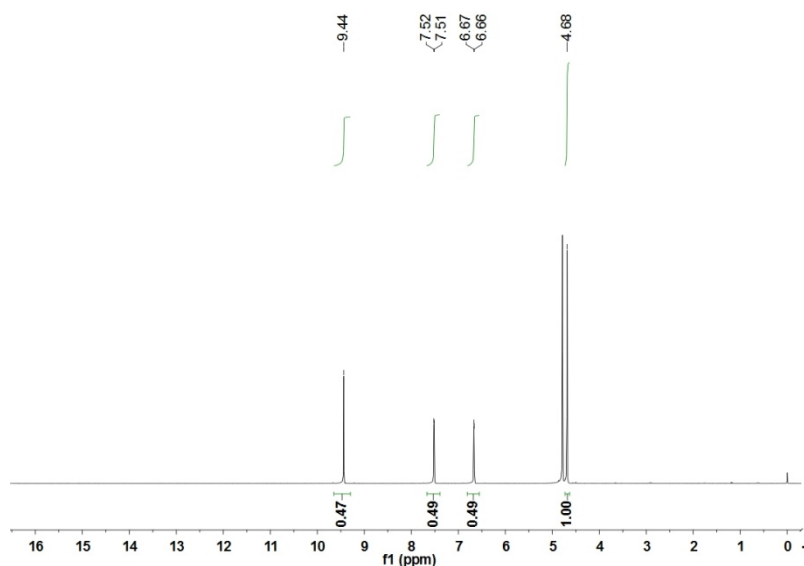

**Figure S8 (a):**  $^1\text{H}$  NMR spectrum of HMF.

$^1\text{H}$  NMR ( $\text{D}_2\text{O}$ , 400 MHz):  $\delta$  4.68 (s, 2H), 6.66 (d,  $J = 4$  Hz, 1H), 7.51 (d,  $J = 4$  Hz, 1H), 9.44 (s, 1H).

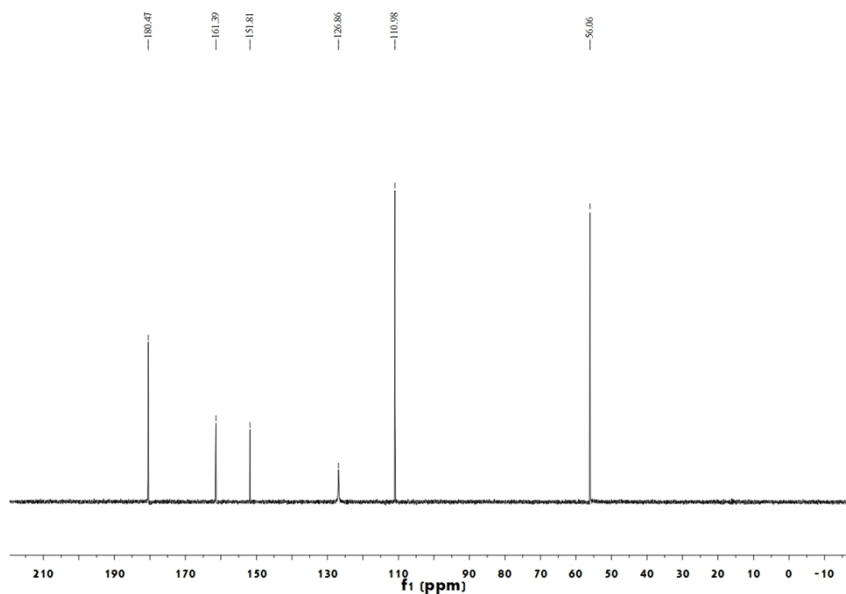

**Figure S8 (b):**  $^{13}\text{C}$  NMR spectrum of HMF.

$^{13}\text{C}$  NMR ( $\text{CD}_3\text{Cl}$ , 100 Hz):  $\delta$ (ppm) 56.06, 110.98, 126.86, 151.81, 161.39, 180.47.

**Table S1** Dehydration of fructose to HMF using different catalysts

| Entry | Catalyst                   | Time(min ) | Temperature( $^{\circ}\text{C}$ ) | Fructose conversion (%) | HMF Yield (%) |
|-------|----------------------------|------------|-----------------------------------|-------------------------|---------------|
| 1     | IM- $\text{HSO}_4$ -MCM-41 | 60         | 130                               | 99.9                    | 87.5          |
| 2     | IM- $\text{HSO}_4$ -MCM-41 | 60         | 140                               | 99.9                    | 82.3          |
| 3     | IM-Cl-MCM-41               | 60         | 130                               | 99.9                    | 76.5          |
| 4     | IM-Cl-MCM-41               | 60         | 140                               | 99.9                    | 74.2          |

Reaction Conditions: Fructose (100mg), catalyst (40 mg), solvent (2mL DMSO).
